# Supplementary material
Source: MDPI journal article supplement (https://www.mdpi.com/2227-7390/10/5/802)

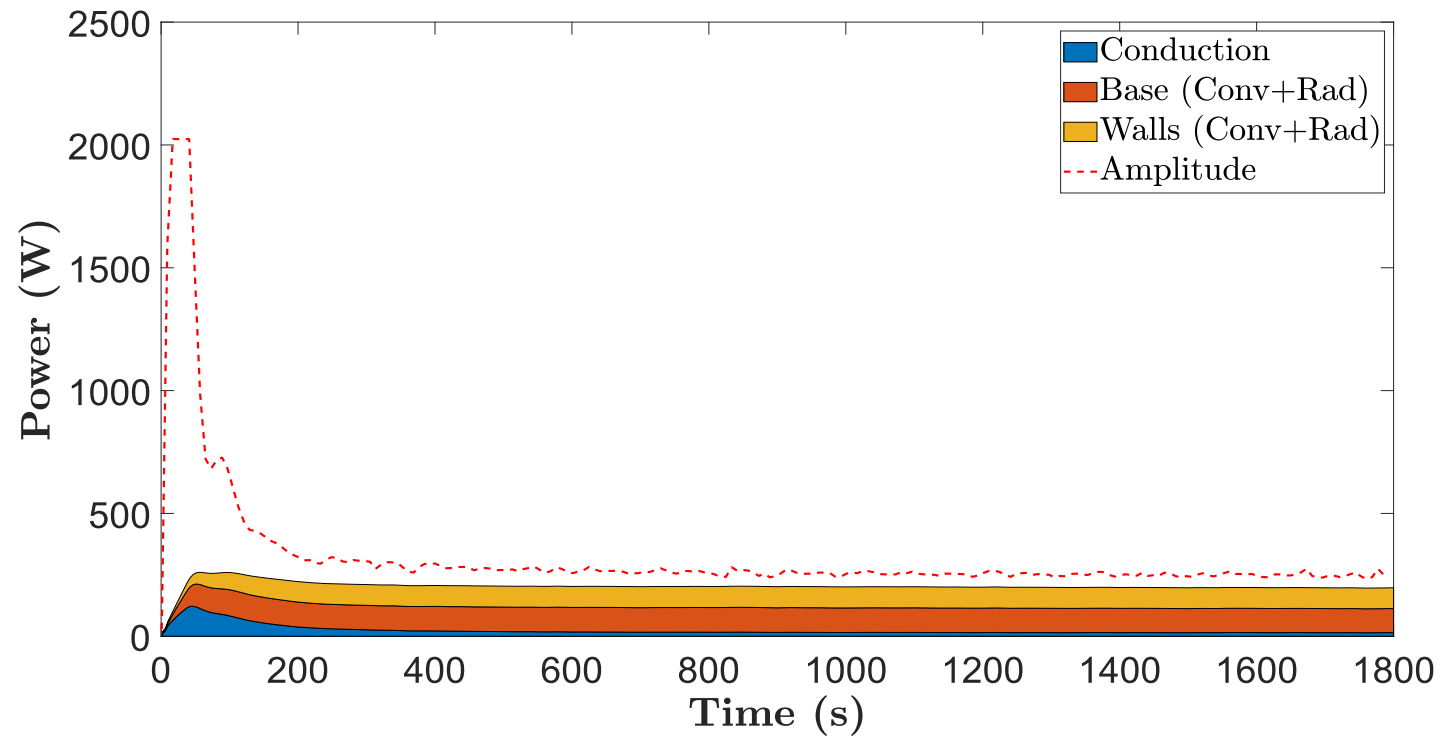

a)

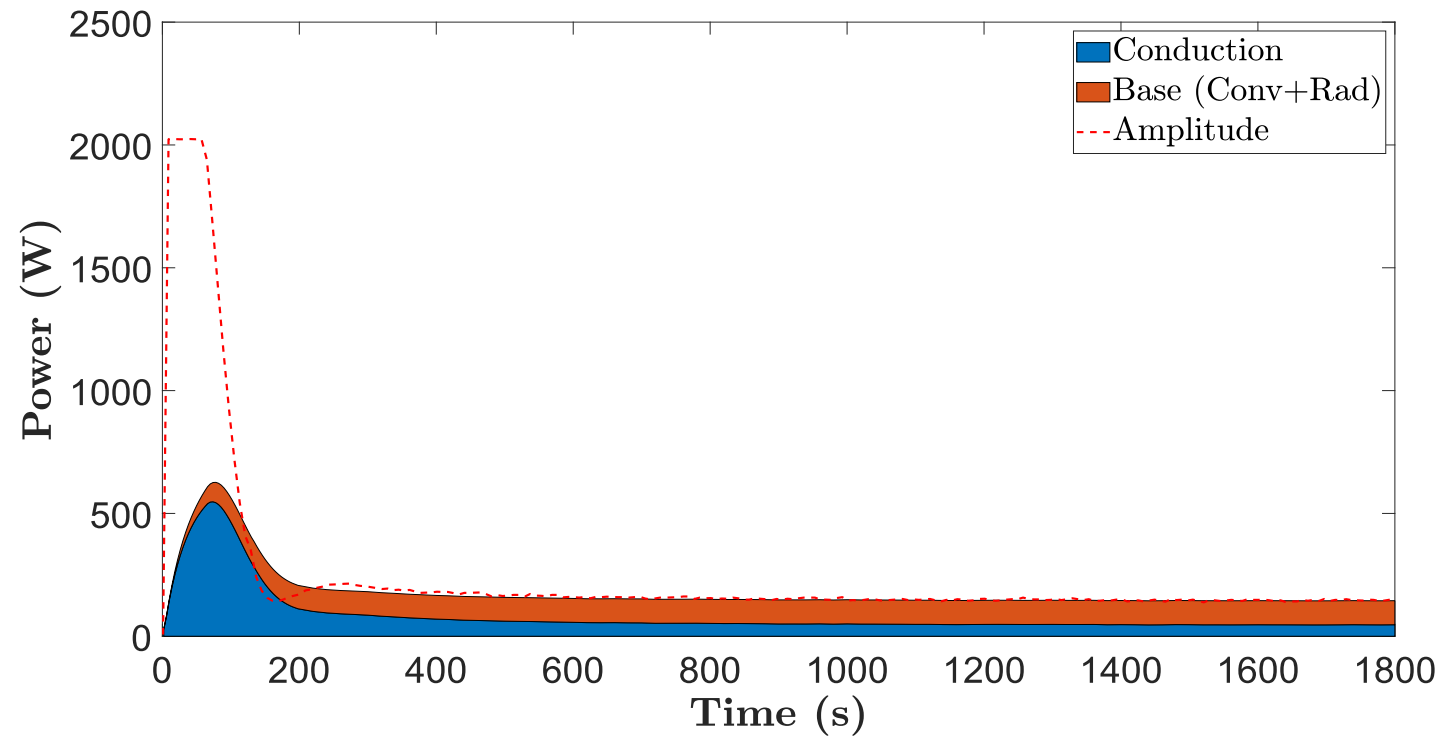

b)

Supplement: s1 [file s1]

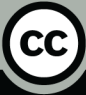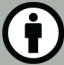

BY

Supplement: s1 [file s1]

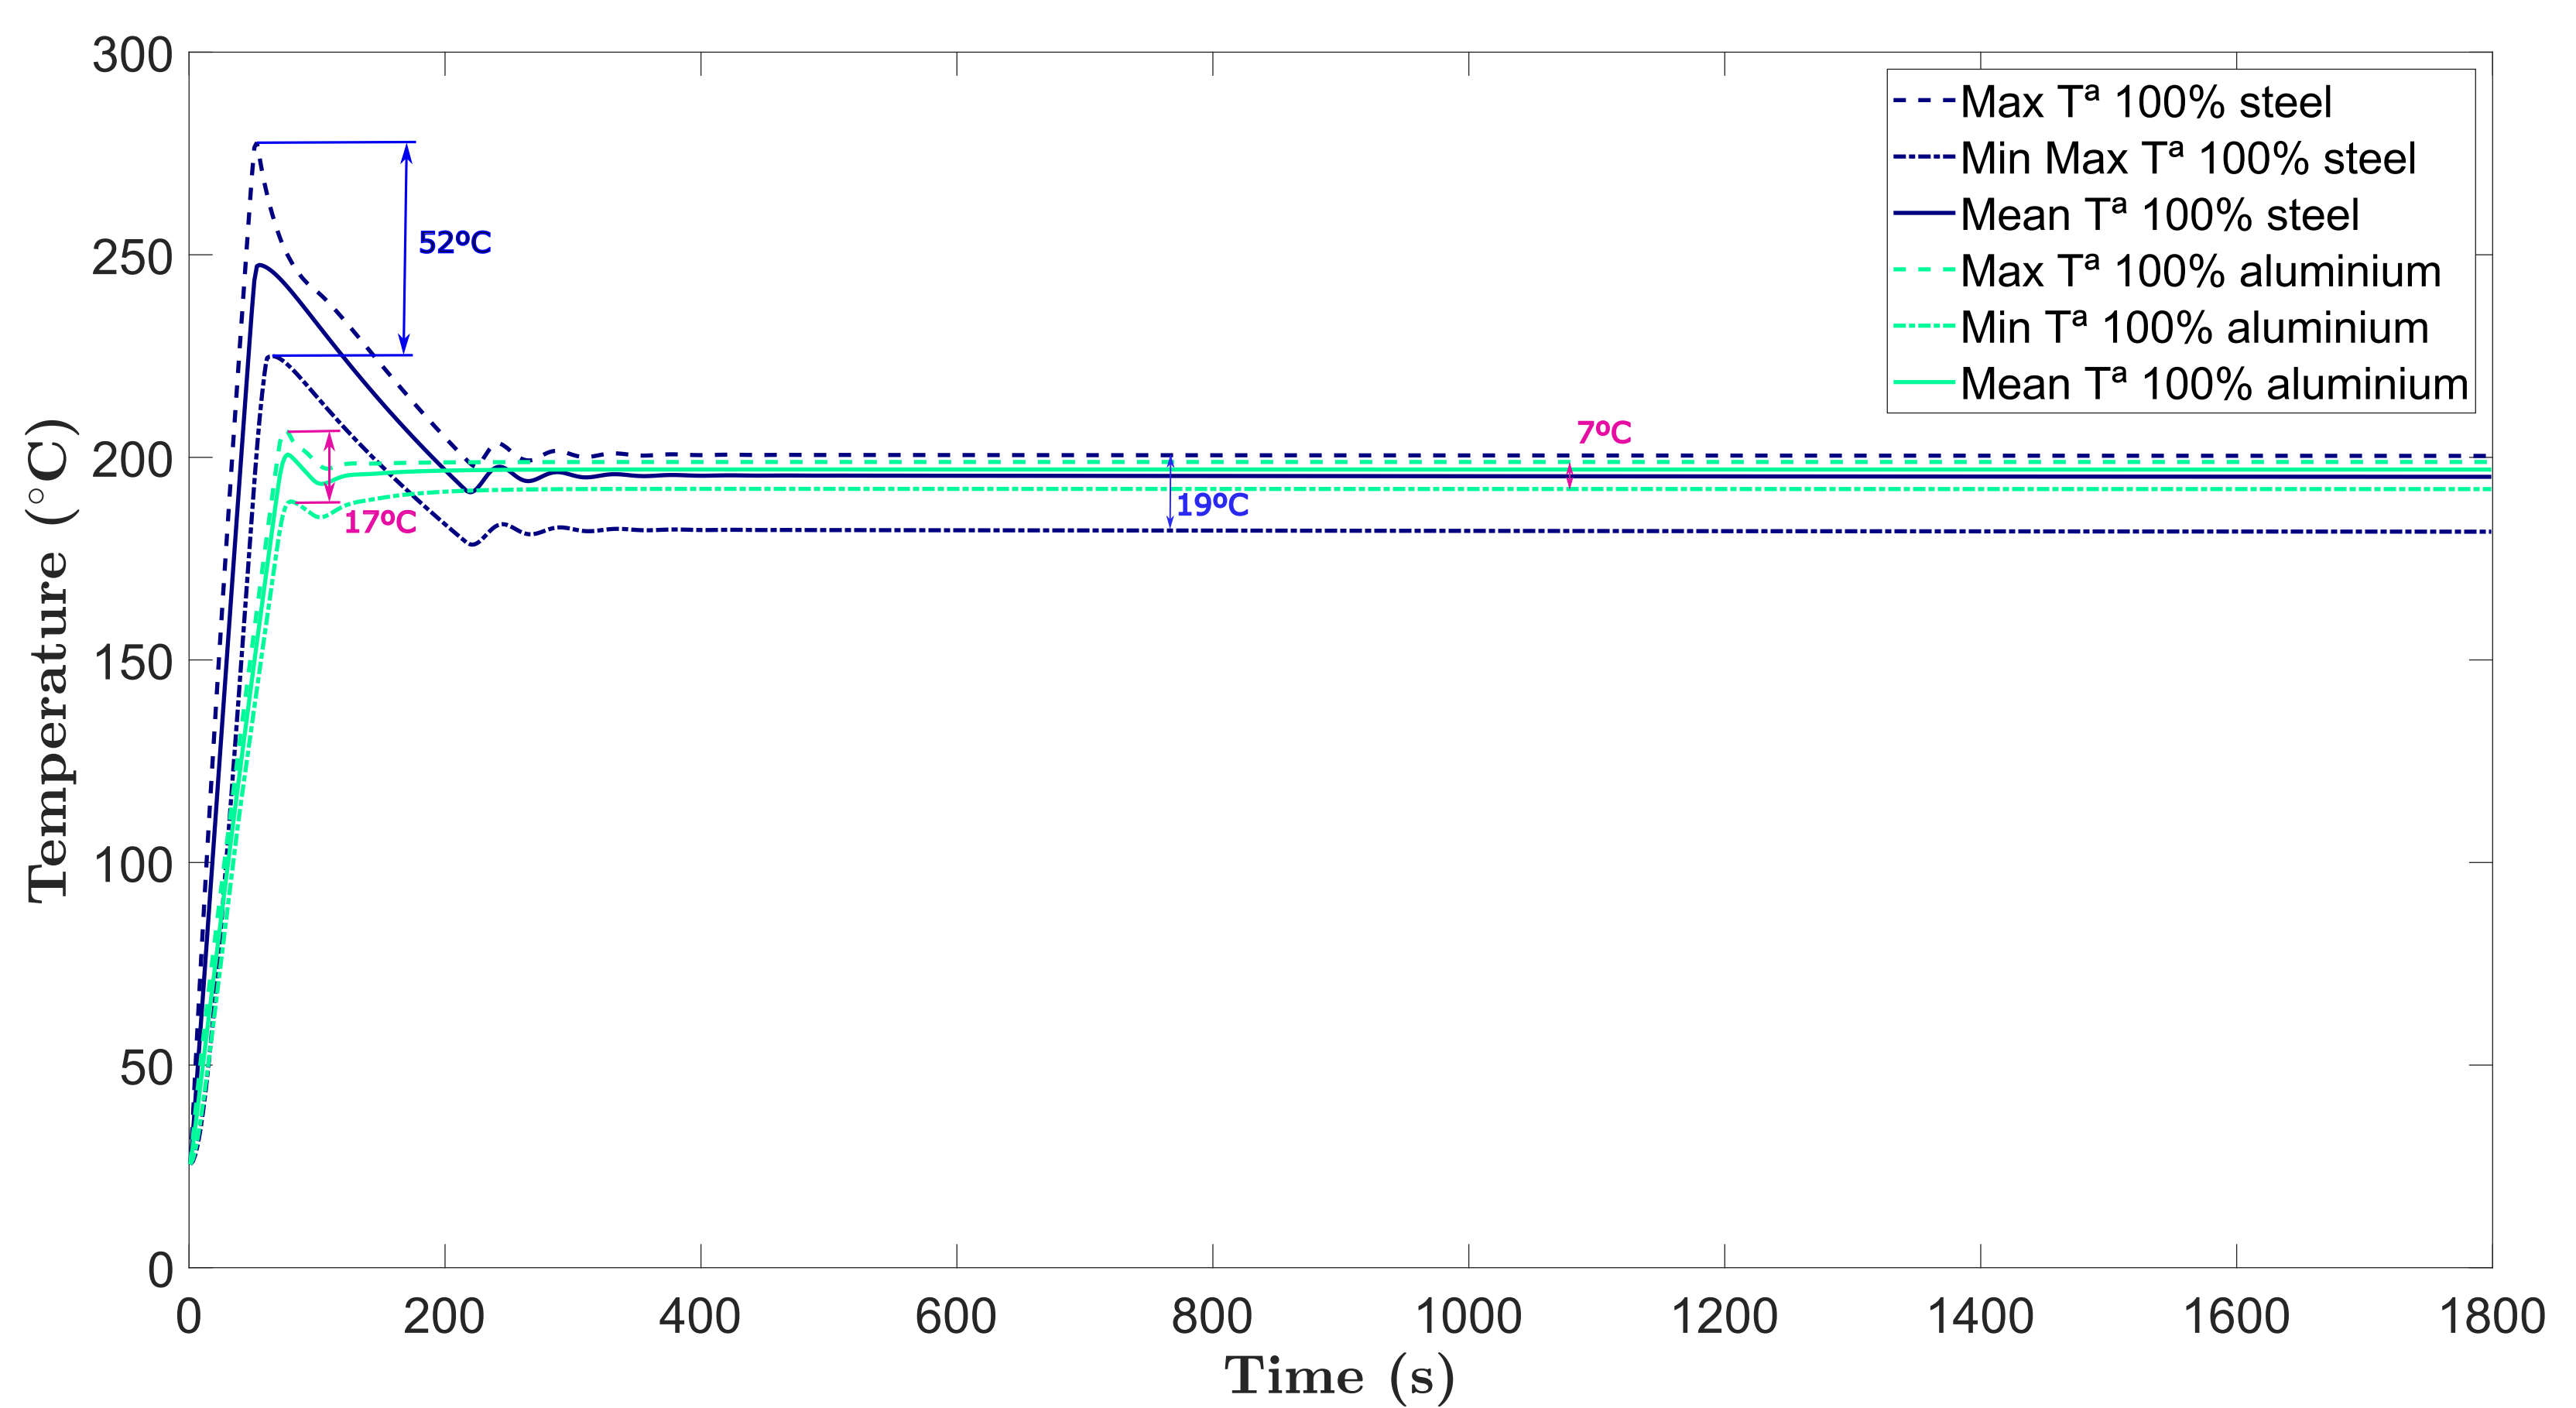

Supplement: s1 [file s1]

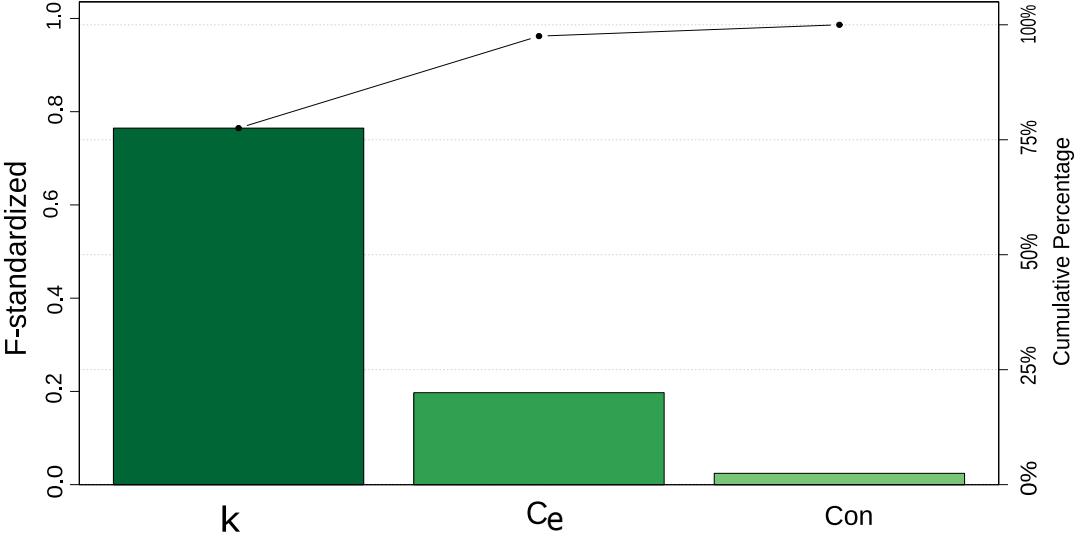

a)

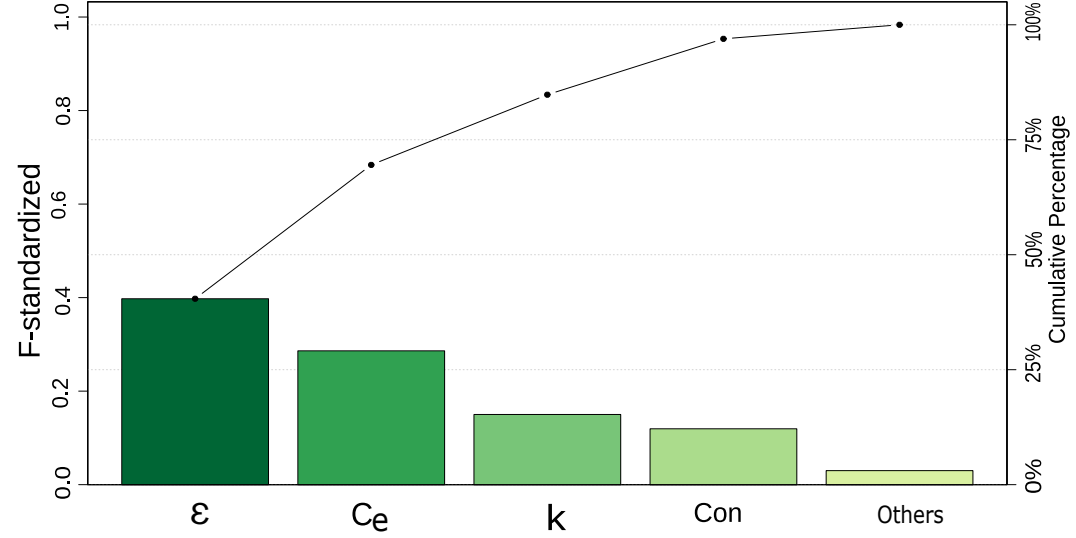

b)

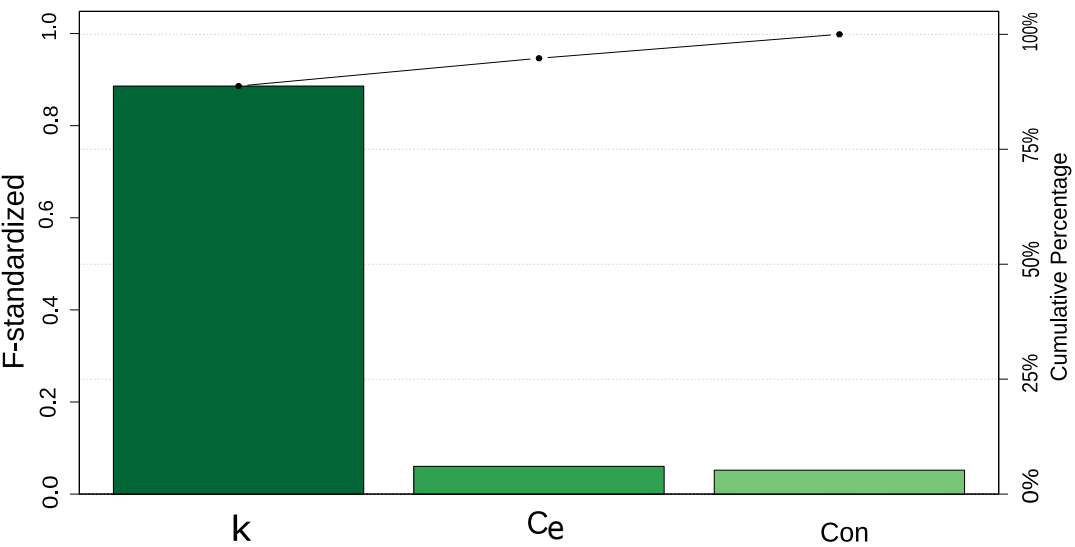

c)

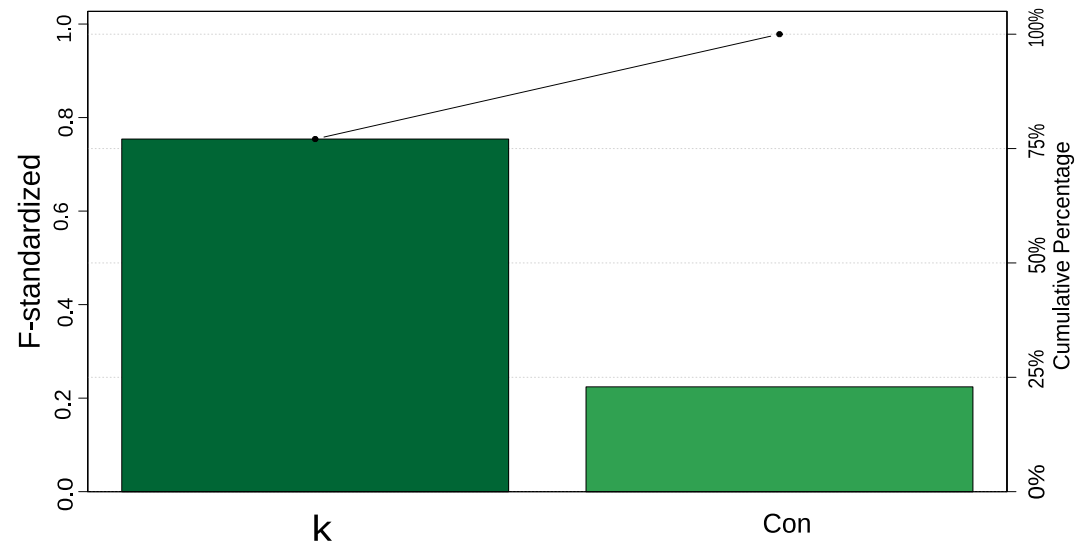

d)

Supplement: s1 [file s1]

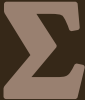

*mathematics*

Supplement: s1 [file s1]

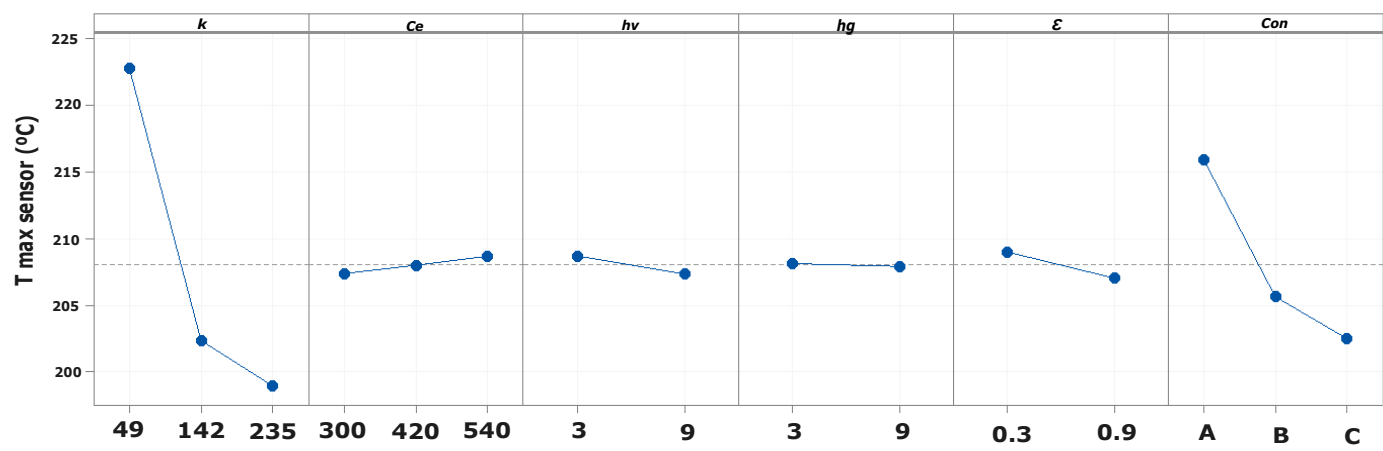

a)

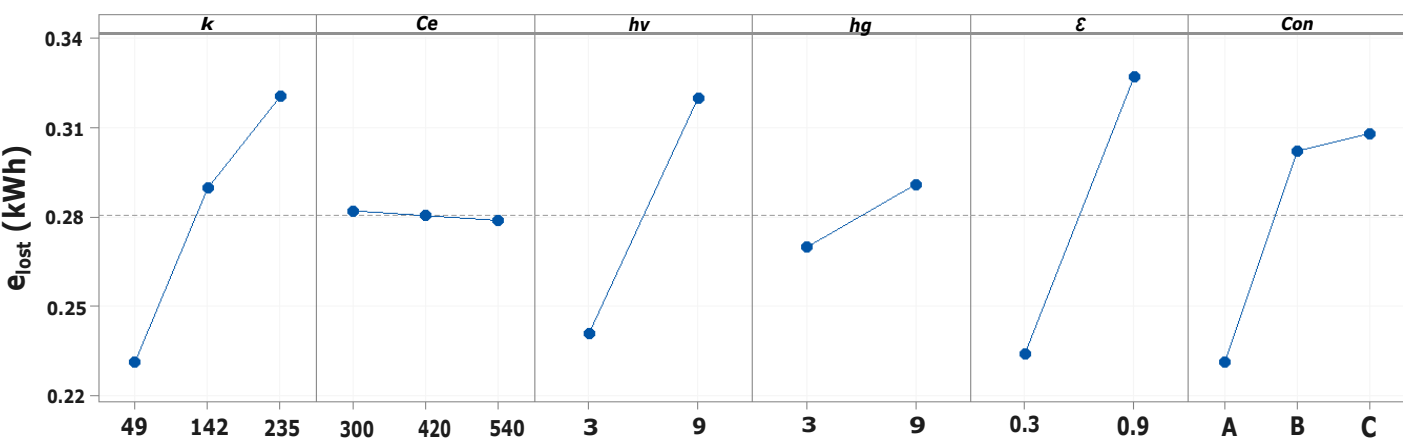

b)

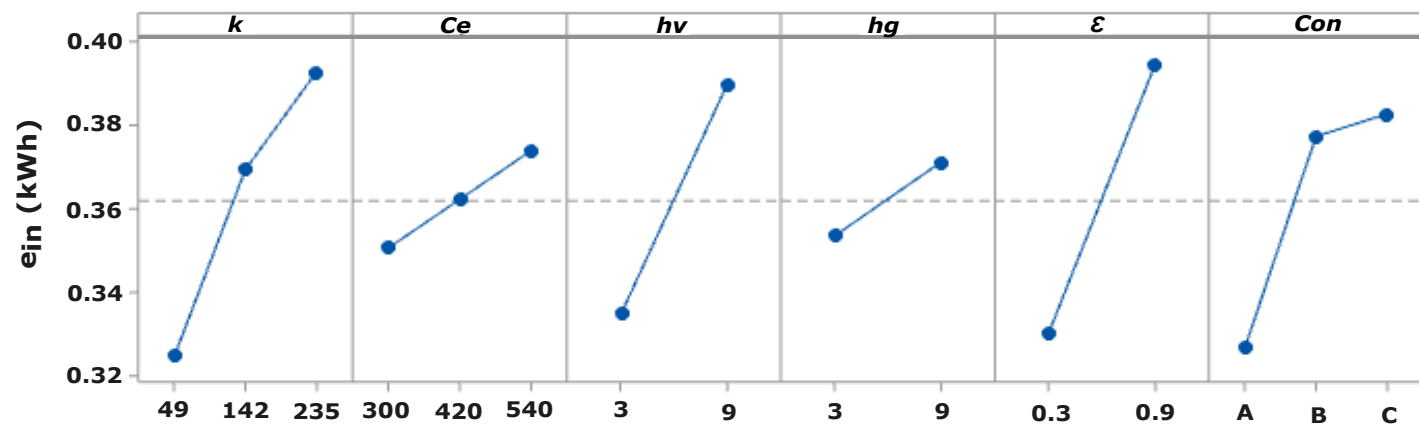

c)

Supplement: s1 [file s1]

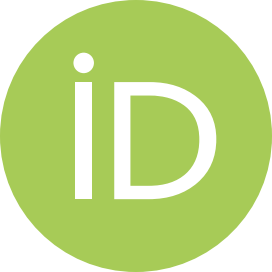

Supplement: s1 [file s1]
